# Supplementary material for: A screen of repurposed drugs identifies AMHR2/MISR2 agonists as potential contraceptives
Source: PubMed Central journal article supplement (PMC9169708; doi:10.1073/pnas.2122512119), 2022-04-05
Supplement: pnas.2122512119.sapp.pdf [file pnas.2122512119.sapp.pdf]

FigS1

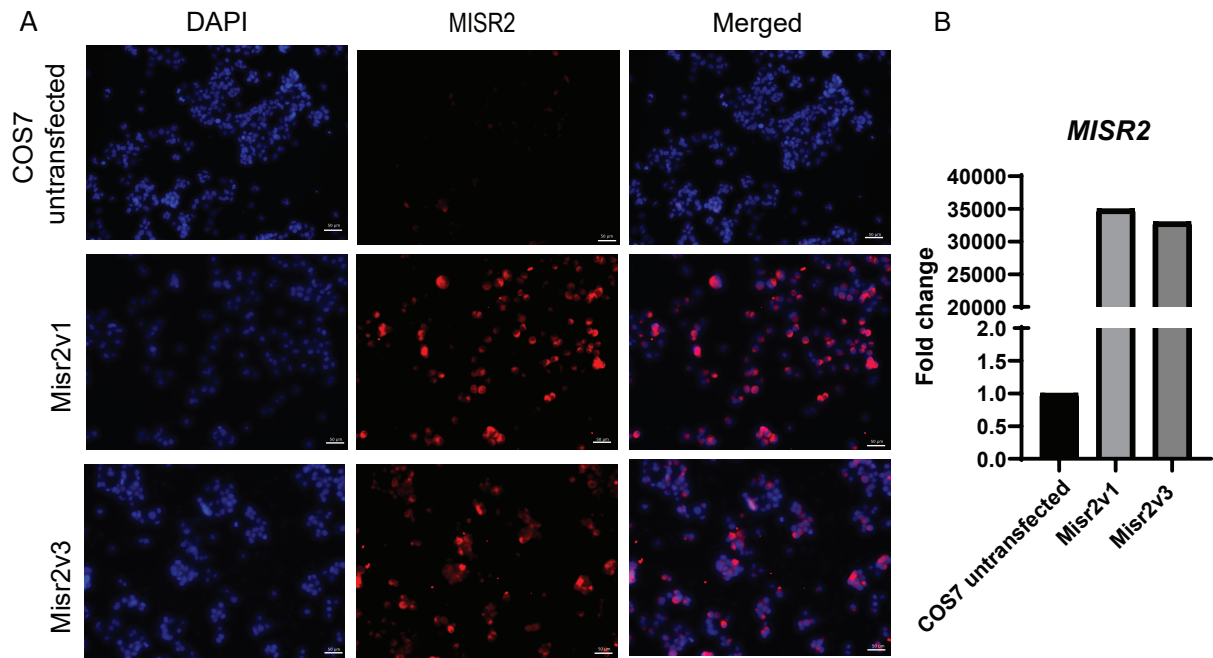

Figure S1: Validation of MISR2v3 protein and mRNA expression.

A) Immunofluorescence of MISR2 in COS7 untransfected or transfected with MISR2v1 or MISR2v3.

B) qPCR validation of MISR2 mRNA expression in MISR2v1 and MISR2v3 transfected COS7 cells.

FigS2

## Atom Pairs -Tanimoto Structural Correlation

A

|                            | Diosmetin | PPY-A | Gandotinib (LY2784544) | Apigenin | Linifanib (ABT-869) | Chrysin | Crizotinib | AG 494 | CYC116 | SP600125 | Quercetin | INH1  | ADX 10059 hydrochloride | Clobenpropit dhydrobromide | PJ 34 hydrochloride | Ruxoaltinib (NCB018424) |
|----------------------------|-----------|-------|------------------------|----------|---------------------|---------|------------|--------|--------|----------|-----------|-------|-------------------------|----------------------------|---------------------|-------------------------|
| Diosmetin                  |           | 0.293 | 0.138                  | 0.642    | 0.233               | 0.558   | 0.158      | 0.293  | 0.233  | 0.253    | 0.627     | 0.266 | 0.174                   | 0.069                      | 0.266               | 0.073                   |
| PPY-A                      | 0.282     |       | 0.241                  | 0.268    | 0.257               | 0.271   | 0.219      | 0.251  | 0.236  | 0.272    | 0.223     | 0.381 | 0.175                   | 0.107                      | 0.313               | 0.121                   |
| Gandotinib (LY2784544)     | 0.146     | 0.196 |                        | 0.117    | 0.213               | 0.110   | 0.251      | 0.111  | 0.290  | 0.109    | 0.119     | 0.190 | 0.133                   | 0.167                      | 0.180               | 0.187                   |
| Apigenin (ABT-869)         | 0.909     | 0.297 | 0.152                  |          | 0.248               | 0.741   | 0.143      | 0.338  | 0.144  | 0.294    | 0.619     | 0.272 | 0.167                   | 0.083                      | 0.257               | 0.083                   |
| Chrysin                    | 0.864     | 0.306 | 0.156                  | 0.950    | 0.306               |         | 0.141      | 0.356  | 0.151  | 0.329    | 0.506     | 0.288 | 0.182                   | 0.078                      | 0.280               | 0.087                   |
| Crizotinib                 | 0.182     | 0.208 | 0.146                  | 0.163    | 0.184               | 0.167   |            | 0.122  | 0.232  | 0.113    | 0.135     | 0.185 | 0.162                   | 0.173                      | 0.137               | 0.178                   |
| AG 494                     | 0.265     | 0.167 | 0.149                  | 0.242    | 0.225               | 0.212   | 0.159      |        | 0.166  | 0.272    | 0.313     | 0.332 | 0.198                   | 0.105                      | 0.275               | 0.105                   |
| CYC116                     | 0.143     | 0.149 | 0.136                  | 0.150    | 0.174               | 0.154   | 0.143      | 0.237  |        | 0.179    | 0.130     | 0.255 | 0.172                   | 0.187                      | 0.217               | 0.187                   |
| SP600125                   | 0.345     | 0.184 | 0.163                  | 0.370    | 0.250               | 0.385   | 0.146      | 0.188  | 0.162  |          | 0.257     | 0.311 | 0.151                   | 0.105                      | 0.375               | 0.147                   |
| Quercetin                  | 0.913     | 0.282 | 0.146                  | 0.909    | 0.282               | 0.864   | 0.182      | 0.265  | 0.143  | 0.345    |           | 0.206 | 0.150                   | 0.066                      | 0.216               | 0.066                   |
| INH1                       | 0.222     | 0.220 | 0.146                  | 0.235    | 0.191               | 0.242   | 0.156      | 0.194  | 0.231  | 0.182    | 0.222     |       | 0.239                   | 0.157                      | 0.331               | 0.118                   |
| ADX 10059 hydrochloride    | 0.206     | 0.175 | 0.156                  | 0.219    | 0.175               | 0.226   | 0.195      | 0.212  | 0.154  | 0.200    | 0.206     | 0.206 |                         | 0.114                      | 0.153               | 0.077                   |
| Clobenpropit dhydrobromide | 0.200     | 0.171 | 0.178                  | 0.212    | 0.171               | 0.219   | 0.163      | 0.206  | 0.150  | 0.194    | 0.200     | 0.235 | 0.219                   |                            | 0.117               | 0.157                   |
| PJ 34 hydrochloride        | 0.250     | 0.186 | 0.192                  | 0.265    | 0.214               | 0.273   | 0.128      | 0.294  | 0.225  | 0.482    | 0.250     | 0.154 | 0.167                   | 0.162                      |                     | 0.136                   |
| Ruxoaltinib (NCB018424)    | 0.184     | 0.244 | 0.143                  | 0.194    | 0.214               | 0.200   | 0.295      | 0.128  | 0.225  | 0.177    | 0.184     | 0.184 | 0.167                   | 0.132                      | 0.180               |                         |

## Maximum Common Substructure - Tanimoto Structural Correlation

B

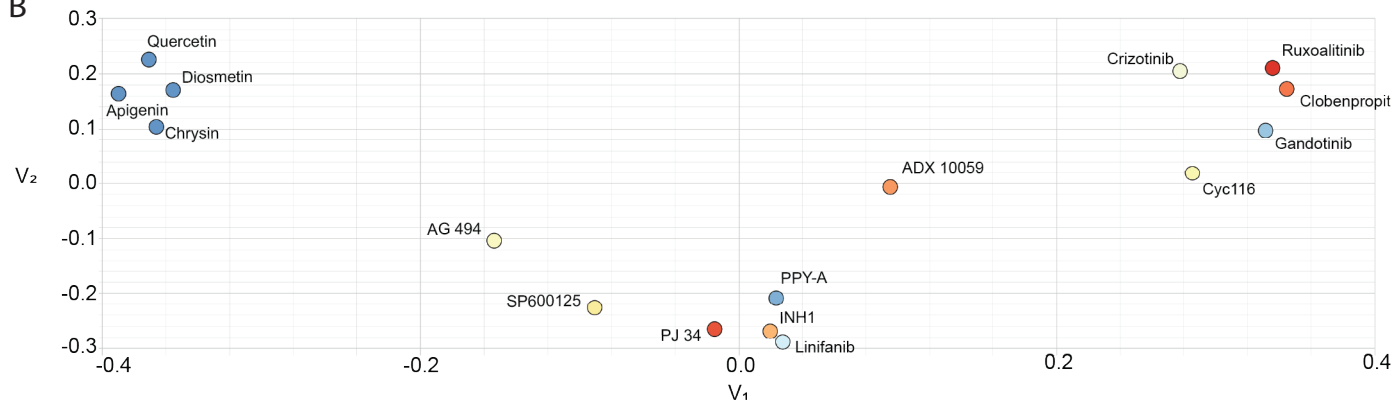

Figure S2: Structural homology of selected candidate agonists.

A) Atom pair and maximum common substructure Tanimoto correlation.

B) Principal component analysis clustering using Tanimoto correlation values

FigS3

A.

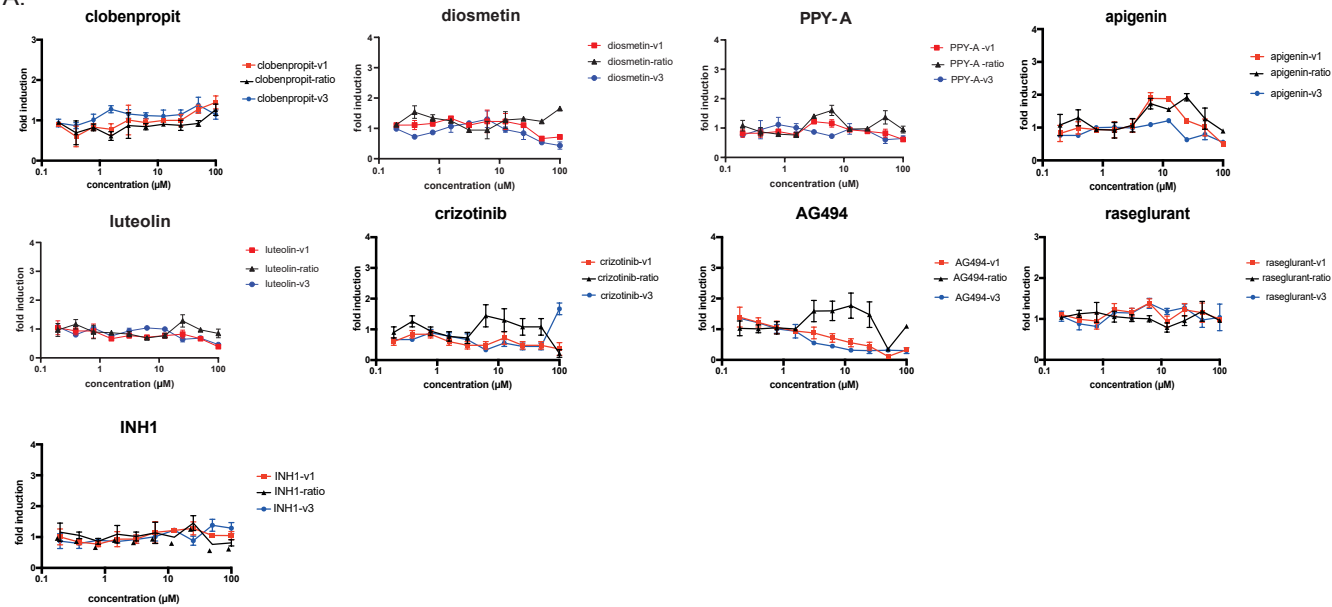

B.

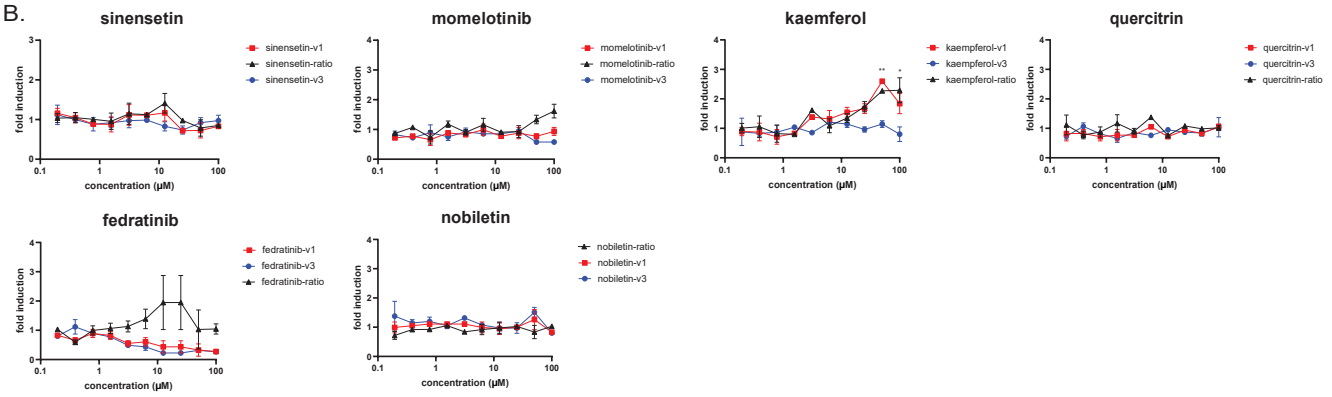

C.

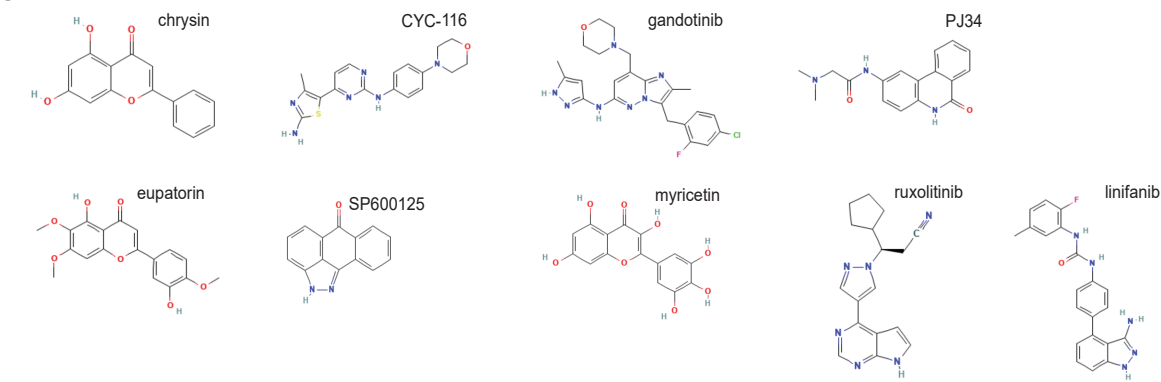

Figure S3 : Activity and structure of screen hits and related chemical compounds

A-B) Luciferase induction compared to vehicle control is plotted across a 10-point range (195nM to 100µM) of compounds tested in the first screen (A), compounds added based on their chemical proximity to the initial library compounds (B), in COS7 cells transfected with either MISR2v1 in red or MISR2v3 in blue (in addition to ALK2/SMAD1/Bre-luc) and incubated for 24h. The MISR2v1/MISR2v3 signal ratio is also plotted in black (replicated twice, mean  $\pm$  SEM). C) Structure of selected candidate agonists.

FigS4

*Misr2**Nr5a2**Nobox*

A

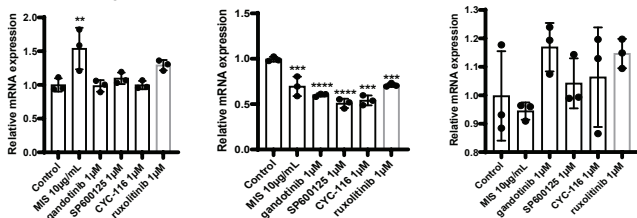

B

Control

MIS

gandotinib

SP600125

CYC-116

ruxolitinib

*Misr2*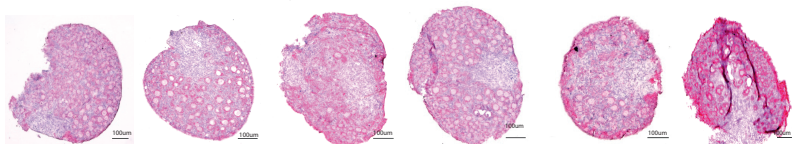*Igfbp5*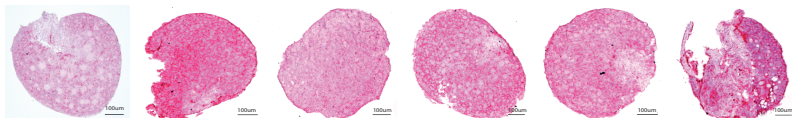*Id3*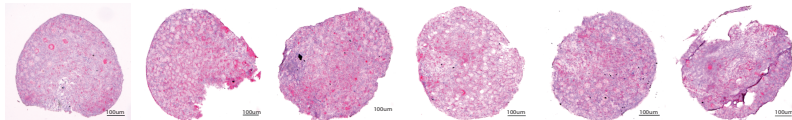

Figure S4: MISR2 agonists regulate MIS downstream targets but not MISR2 nor oocytes specific genes. PND2 mice ovaries were incubated for 48h with 1 $\mu$ M of candidate MISR2 agonists gandotinib, SP600125, CYC-116, ruxolitinib or MIS at 10 $\mu$ g/ml as a positive control and vehicle control (DMSO). A) qPCR evaluation of *Misr2*, the granulosa cell marker *Nr5a2* and the oocyte marker *Nobox* (n=3 per group, mean  $\pm$  SD; \*\*P < 0.01, \*\*\*P < 0.005, \*\*\*\*P < 0.001). B) Pattern of expression of *Misr2*, *Id3*, and *Igfbp5* evaluated by RNAish (representative ovary section, n=1 per treatment)

FigS5

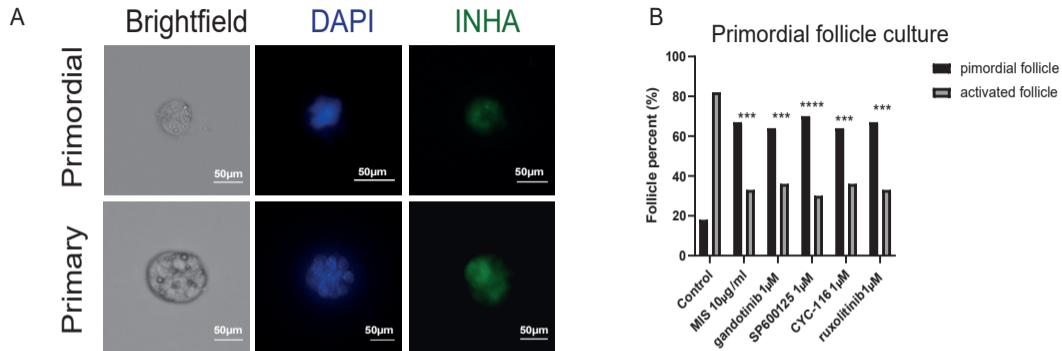

Figure S5: Effect of MISR2 agonists on primordial follicles activation

A-B) Follicle activation was scored based on cytomorphology, confirmed by INHA immunofluorescence (N=33 per group) (A) in primordial follicles from adult mice cultured in vitro for 48h with 1µM of candidate MISR2 agonists gandotinib, SP600125, CYC-116, ruxolitinib or MIS at 10µg/ml as a positive control and DMSO as a vehicle control (B).

**Table S1: Probes used for RNA in situ hybridization (RNAscope)**

| Gene name     | Species | Accession number            | Detection region | ACD catalog number |
|---------------|---------|-----------------------------|------------------|--------------------|
| <i>Igfbp5</i> | Mouse   | <a href="#">NM_010518.2</a> | 746 - 1999       | Cat No. 425731     |
| <i>Id3</i>    | Mouse   | <a href="#">NM_008321.2</a> | 8 - 848          | Cat No. 445881     |
| <i>Misr2</i>  | Mouse   | <a href="#">NM_144547.2</a> | 914 - 1809       | Cat No. 489821     |

**Table S2: Primers designed for qPCR**

| Gene name     | Forward              | Reverse               | NCBI                           | Species |
|---------------|----------------------|-----------------------|--------------------------------|---------|
| <i>Id2</i>    | TCTGGGGGATGCTGGGCACC | GCTTGGGCATCTCCCGGAGC  | <a href="#">NM_010496.3</a>    | Mouse   |
| <i>ID2</i>    | CACAAGGAATTGCCCAATC  | GAAGTGGTATTTATTTGGG   | <a href="#">NM_013060.3</a>    | Rat     |
| <i>Id3</i>    | CAGGGTCCAAGCGAACGG   | TTGCCACTGACCCGGTCGTC  | <a href="#">NM_008321.2</a>    | Mouse   |
| <i>ID3</i>    | TCAGCTTAGCCAGGTGGAAA | TGAGCTCAGCTGTCTGGATCG | <a href="#">NM_013058.2</a>    | Rat     |
| <i>Igfbp5</i> | GAGACAGGAATCCGAACAAG | GAGGGCTTACTGCTTTC     | NM_010518.2                    | Mouse   |
| <i>IGFBP5</i> | CCAAGCACACTCGCATT    | GGTCAGATTCCTGTCTCATCT | NM_012817                      | Rat     |
| <i>Smad6</i>  | CTGTCTTTCTCCGAACGGG  | CTTGAGCAGCGAGTACGTGA  | <a href="#">NM_008542.3</a>    | Mouse   |
| <i>SMAD6</i>  | AAGCCACTGGATCTGTCCGA | GCCCTGAGGTAGGTCGTAGA  | NM_001109002.2                 | Rat     |
| <i>Misr2</i>  | GCGGCAGCACAAGTATC    | CATCCTTGCATCTCCACTTG  | <a href="#">NM_001356575.1</a> | Mouse   |
| <i>Nobox</i>  | TAGGAAAATGCGGGGCCAG  | GCTGTGTGCACTCTACAGGT  | <a href="#">NM_130869.3</a>    | Mouse   |
| <i>Nr5a2</i>  | TCATGCTGCCAAAGTGGAGA | TGGTTTTGGACAGTTCGCTT  | <a href="#">NM_001159769.2</a> | Mouse   |
